# Supplementary material
Source: PubMed Central journal article supplement (PMC7415678)

**A****No change accessibility: 28408 OCRs**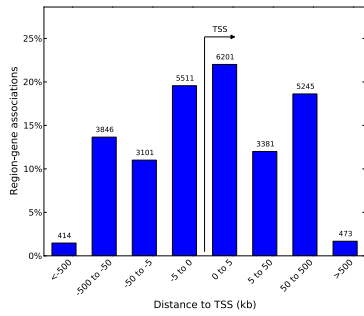

| Motif Name   | P-value   | #OCRs |
|--------------|-----------|-------|
| NFY(CCAAT)   | 1.00E-592 | 7740  |
| Ronin(THAP)  | 1.00E-545 | 1150  |
| Elk4(ETS)    | 1.00E-523 | 8012  |
| GFY-Staf(Zf) | 1.00E-439 | 1294  |
| ETV4(ETS)    | 1.00E-438 | 11574 |
| Sp1(Zf)      | 1.00E-436 | 8350  |
| YY1(Zf)      | 1.00E-430 | 1585  |
| NFY(CCAAT)   | 1.00E-592 | 7740  |

**Gained accessibility: 13913 OCRs**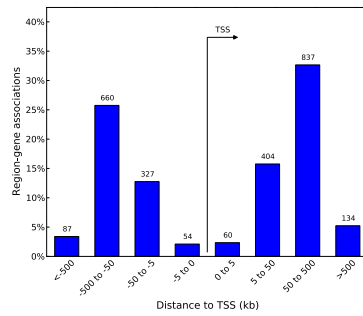

| Motif Name  | P-value  | #OCRs |
|-------------|----------|-------|
| Mef2c(MADS) | 1.00E-20 | 2656  |
| Mef2b(MADS) | 1.00E-12 | 4201  |
| Mef2d(MADS) | 1.00E-12 | 1304  |
| Mef2a(MADS) | 1.00E-09 | 2312  |

**Lost accessibility: 9721 OCRs**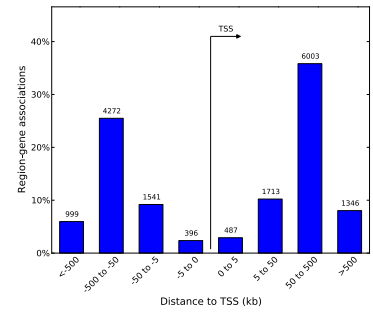

| Motif Name | P-value  | #OCRs |
|------------|----------|-------|
| CTCF(Zf)   | 1.00E-02 | 1143  |

**Gained accessibility, H3K27ac: 2646 OCRs**

| Motif Name    | P-value  | #OCRs |
|---------------|----------|-------|
| Mef2b(MADS)   | 1.00E-25 | 1145  |
| Mef2c(MADS)   | 1.00E-20 | 759   |
| Mef2d(MADS)   | 1.00E-17 | 403   |
| Mef2a(MADS)   | 1.00E-14 | 643   |
| Olig2(bHLH)   | 1.00E-14 | 1910  |
| NeuroG2(bHLH) | 1.00E-06 | 1609  |
| TCF4(bHLH)    | 1.00E-05 | 1528  |
| Twist2(bHLH)  | 1.00E-05 | 1652  |
| BHLHA15(bHLH) | 1.00E-04 | 1454  |
| NeuroD1(bHLH) | 1.00E-02 | 1015  |
| c-Myc(bHLH)   | 1.00E-02 | 296   |
| Bcl11a(Zf)    | 1.00E-02 | 374   |
| Max(bHLH)     | 1.00E-02 | 431   |

**Lost accessibility, H3K27ac: 2023 OCRs**

| Motif Name        | P-value  | #OCRs |
|-------------------|----------|-------|
| Nur77(NR)         | 1.00E-05 | 100   |
| NF1(CTF)          | 1.00E-03 | 467   |
| NF1-halfsite(CTF) | 1.00E-02 | 1259  |
| Tlx(NR)           | 1.00E-02 | 445   |
| RORg(NR)          | 1.00E-02 | 50    |

**B**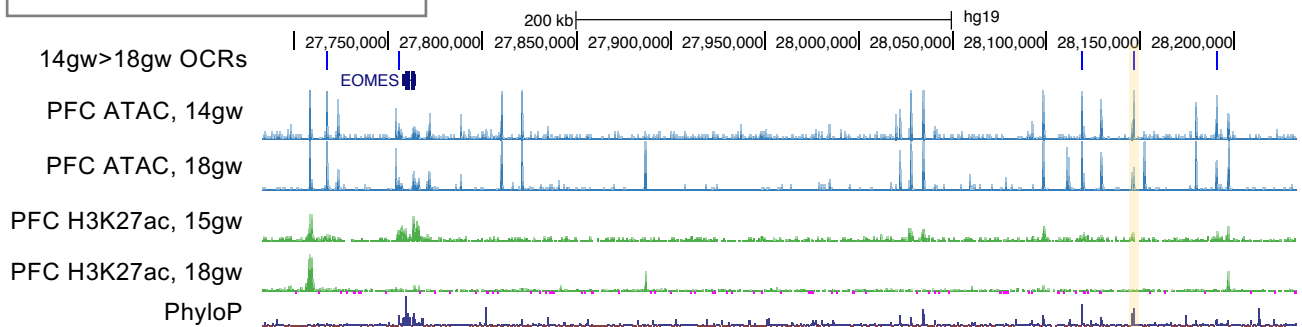**C**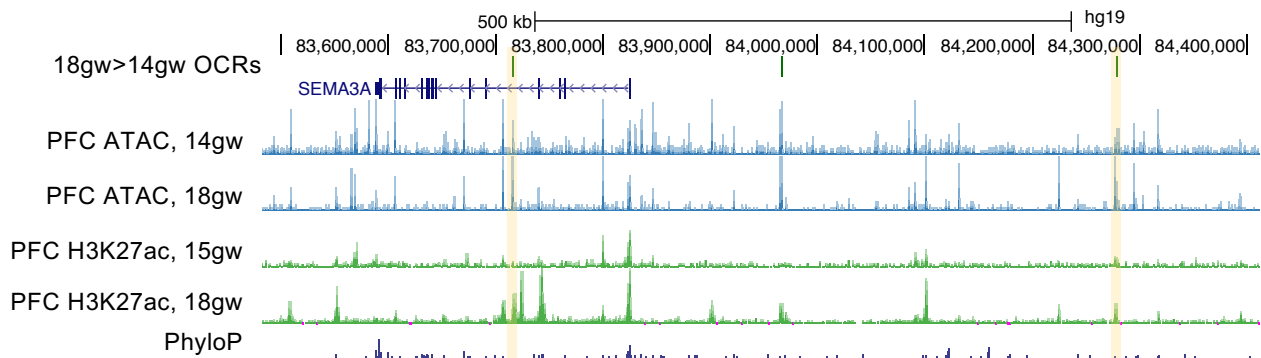

Supplement: NIHMS1600828-supplement-9.pdf [file NIHMS1600828-supplement-9.pdf]
