# Supplementary material
Source: PubMed Central journal article supplement (PMC7415678)
Supplement: NIHMS1600828-supplement-11.pdf [file NIHMS1600828-supplement-11.pdf]

**A**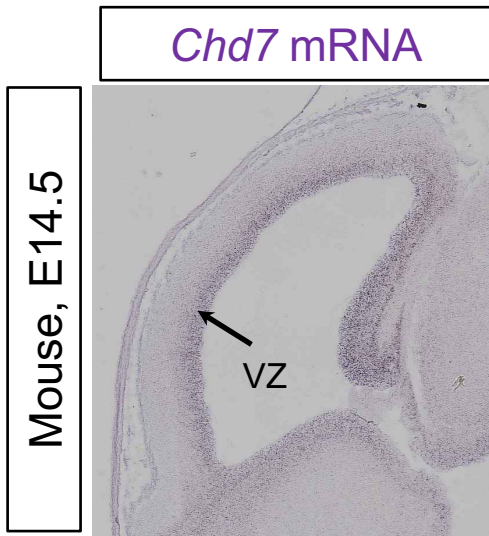**B**

14gw-specific chromatin accessibility, H3K27ac: 422 pREs

| Motif Name                            | P-value  | # pREs with motif |
|---------------------------------------|----------|-------------------|
| Nur77(NR)                             | 1.00E-04 | 30                |
| OCT4-SOX2-TCF-NANOG(POU,Homeobox,HMG) | 1.00E-03 | 51                |
| Sox21(HMG)                            | 1.00E-03 | 207               |
| Lhx3(Homeobox)                        | 1.00E-03 | 228               |
| Lhx1(Homeobox)                        | 1.00E-03 | 182               |
| LHX9(Homeobox)                        | 1.00E-02 | 208               |
| Lhx2(Homeobox)                        | 1.00E-02 | 174               |
| Sox10(HMG)                            | 1.00E-02 | 191               |
| Sox3(HMG)                             | 1.00E-02 | 196               |
| Nkx6.1(Homeobox)                      | 1.00E-02 | 276               |
| En1(Homeobox)                         | 1.00E-02 | 238               |
