# Supplementary material
Source: PubMed Central journal article supplement (PMC7415678)

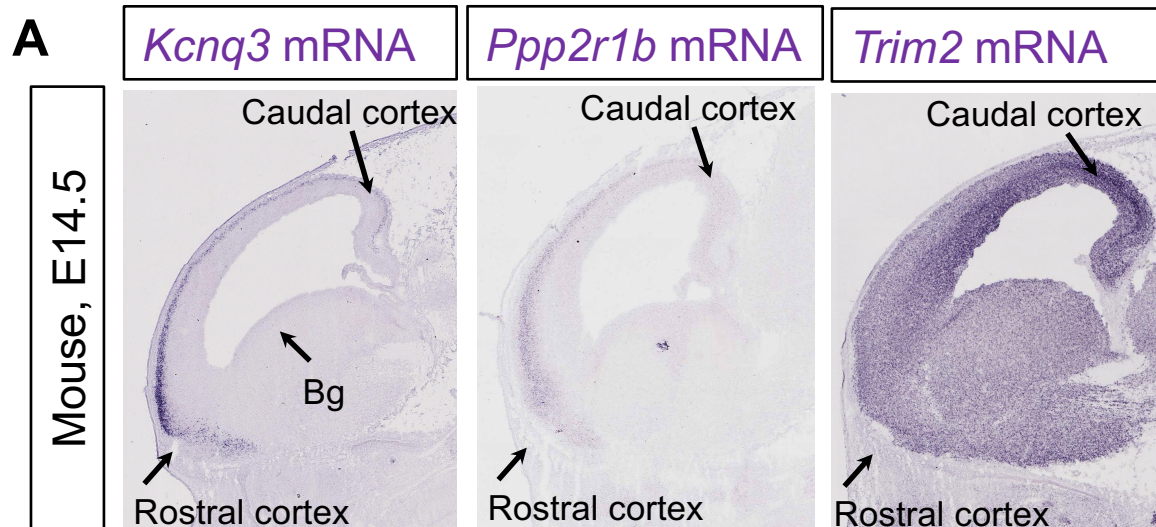

**B**

| region          | # RS OCRs | # RS pREs |
|-----------------|-----------|-----------|
| <b>cge</b>      | 5,937     | 1,300     |
| <b>lge</b>      | 2,591     | 361       |
| <b>mge</b>      | 6,219     | 776       |
| <b>motor</b>    | 3,769     | 362       |
| <b>parietal</b> | 515       | 53        |
| <b>pfc</b>      | 2,898     | 387       |
| <b>S1</b>       | 1,206     | 126       |
| <b>temporal</b> | 3,945     | 454       |
| <b>v1</b>       | 10,612    | 1,500     |

**C**

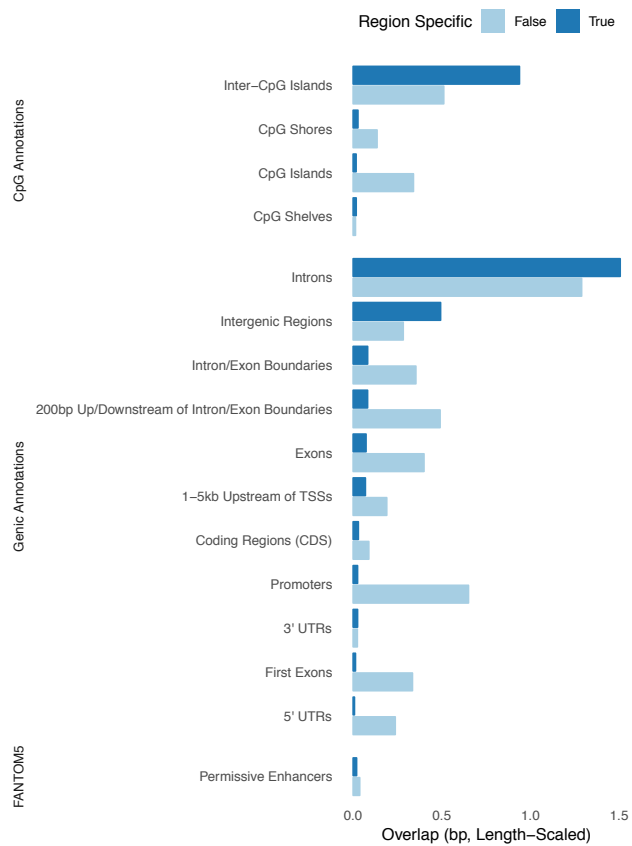

Supplement: NIHMS1600828-supplement-10.pdf [file NIHMS1600828-supplement-10.pdf]

**A**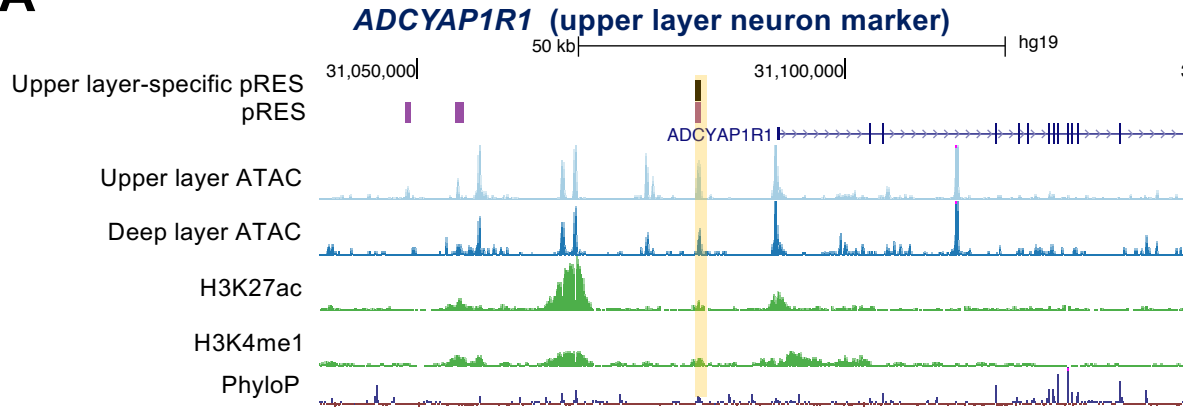**B**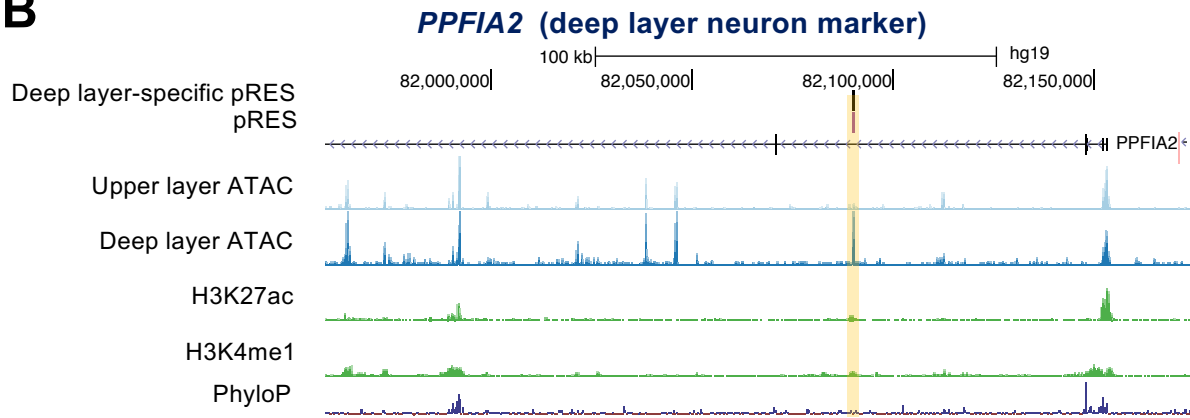**C**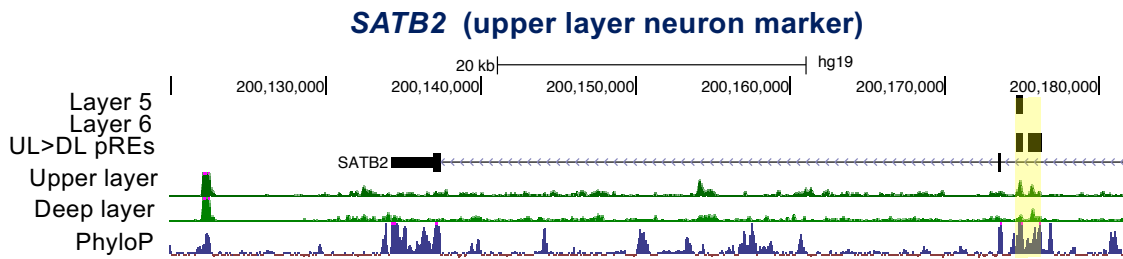

Supplement: NIHMS1600828-supplement-12.pdf [file NIHMS1600828-supplement-12.pdf]

**A**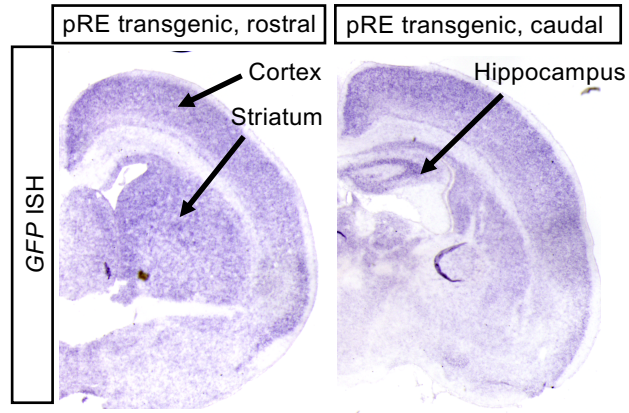**B**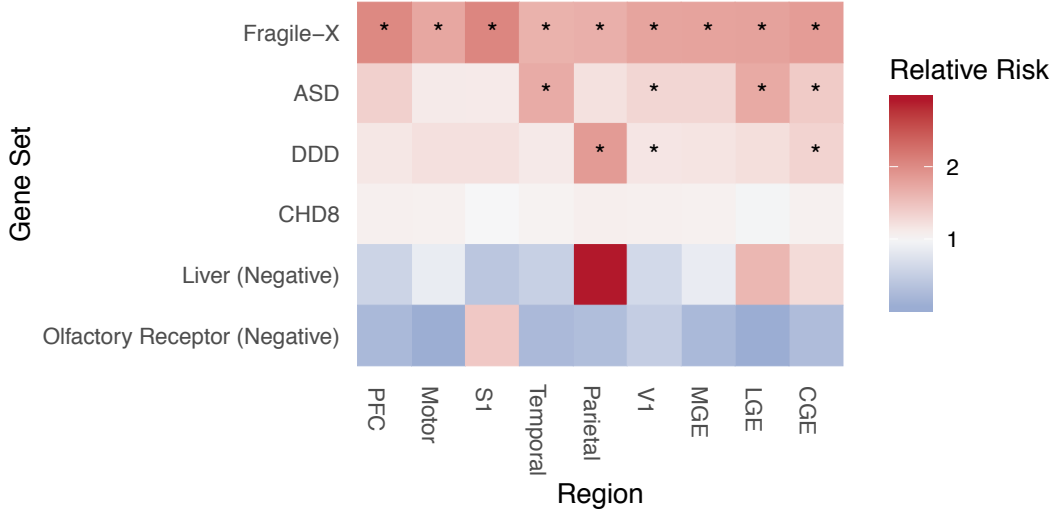**C**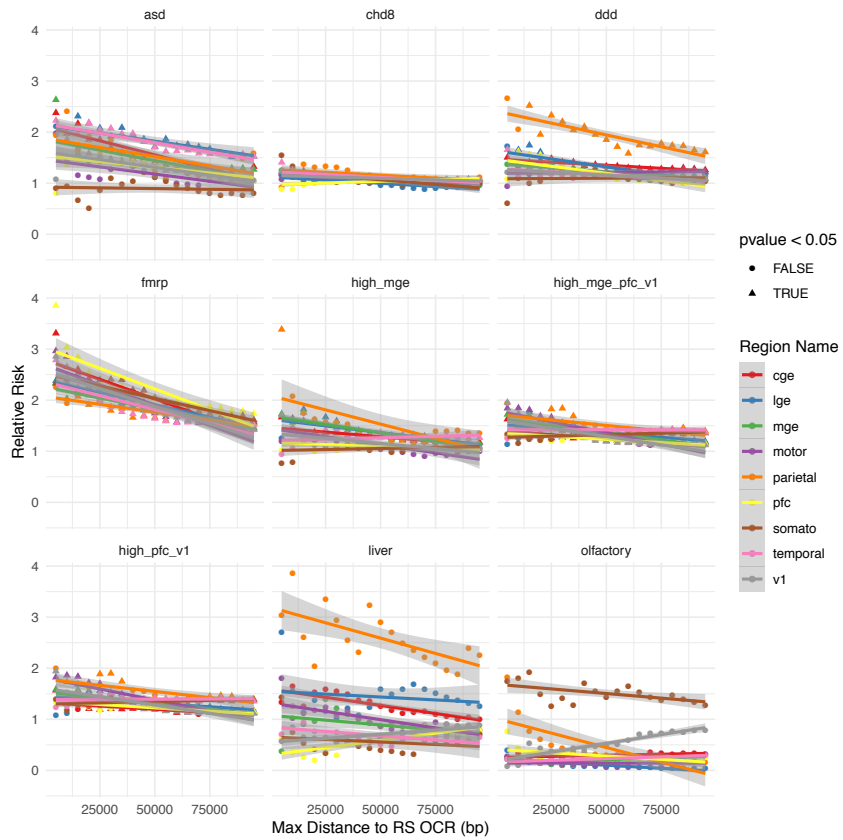

Supplement: NIHMS1600828-supplement-13.pdf [file NIHMS1600828-supplement-13.pdf]

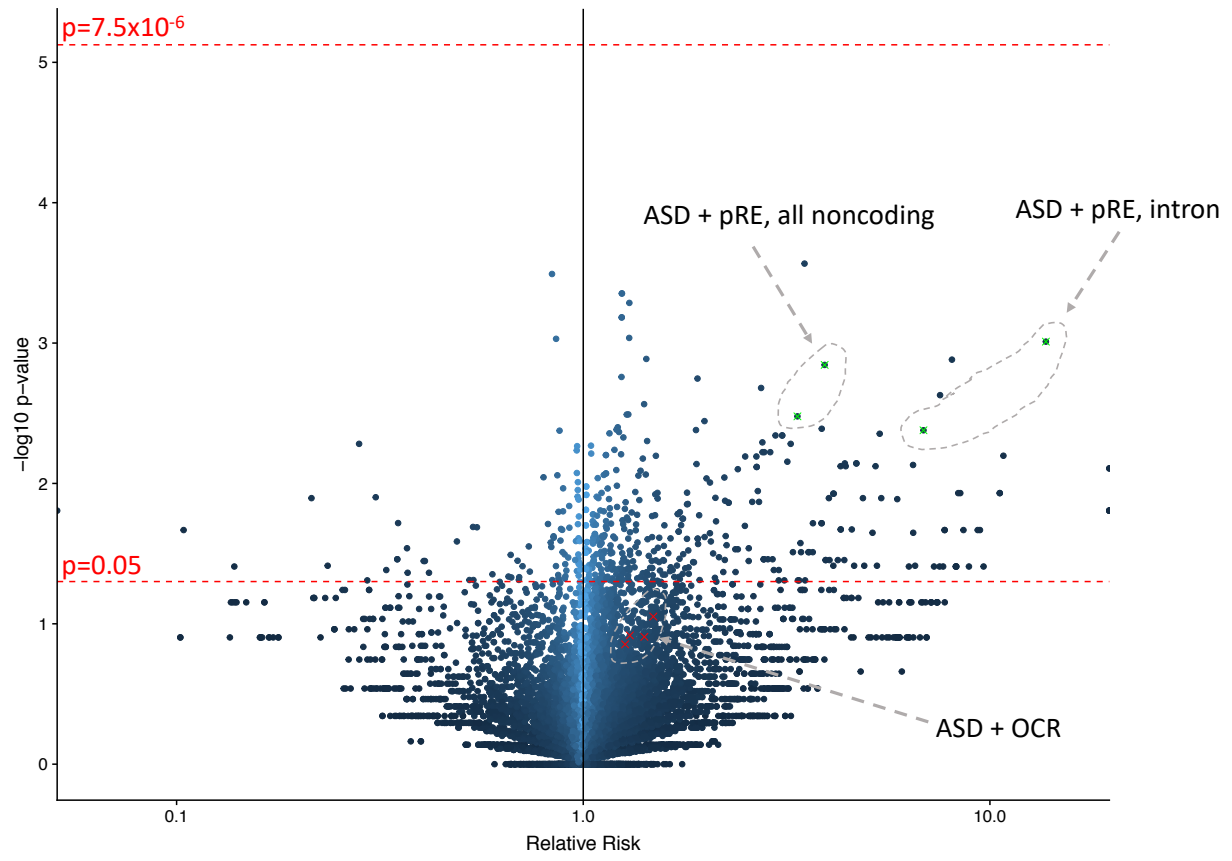

Supplement: NIHMS1600828-supplement-14.pdf [file NIHMS1600828-supplement-14.pdf]

**A**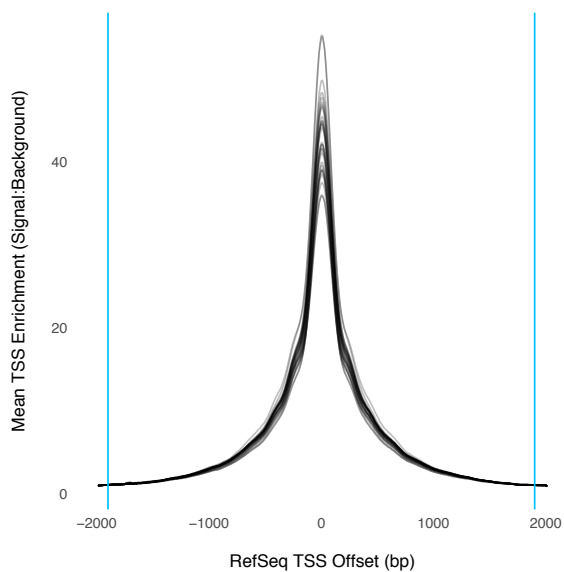**D**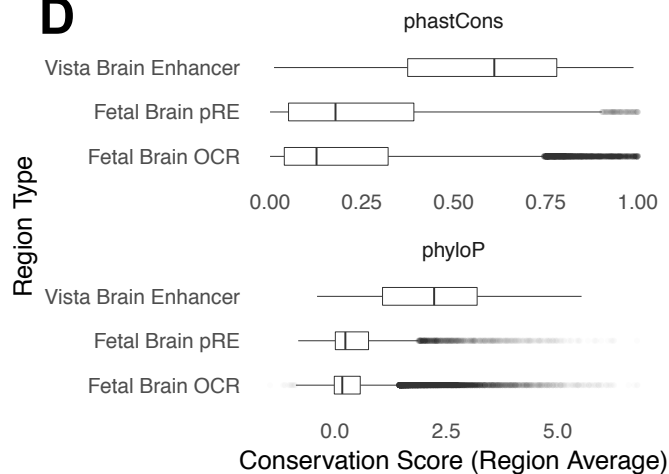**B**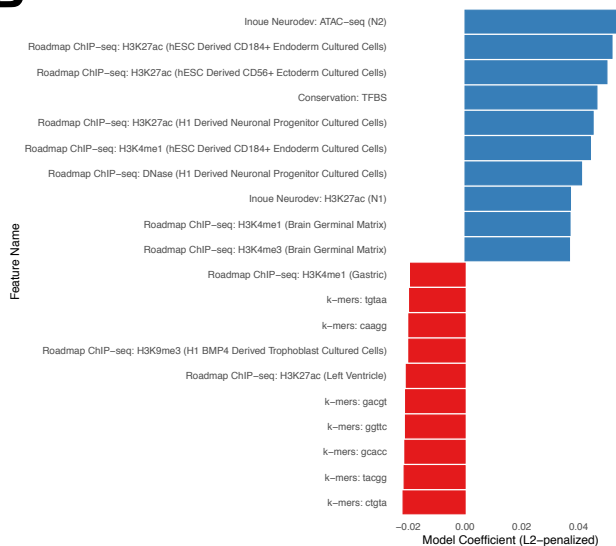**E**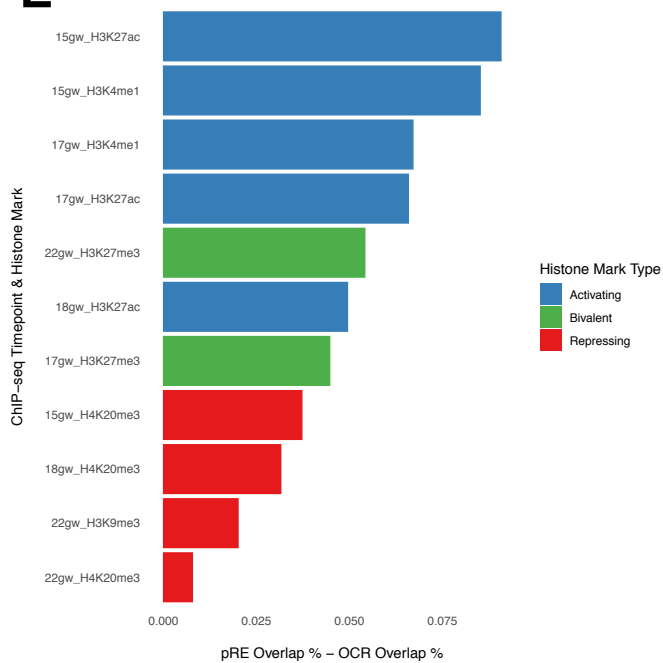**C**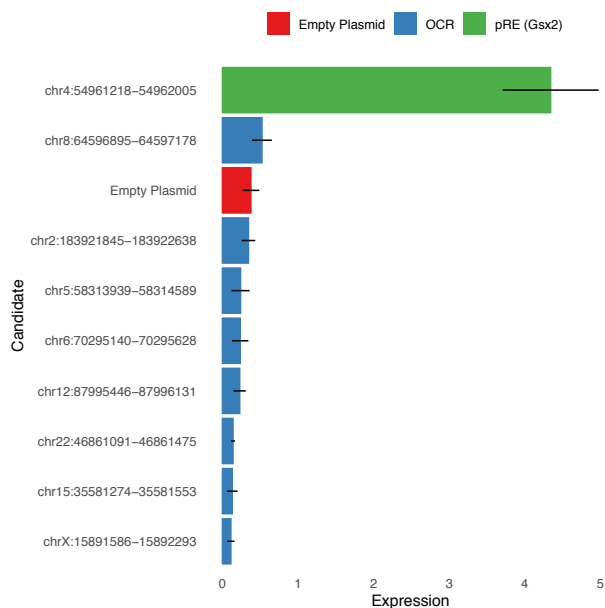

Supplement: NIHMS1600828-supplement-8.pdf [file NIHMS1600828-supplement-8.pdf]
